# Supplementary material for: Impact of Eurasian autumn snow on the winter North Atlantic Oscillation in seasonal forecasts of the 20 th century
Source: Copernicus journal article supplement (doi:10.5194/wcd-2021-52), 2021-08-04
Supplement: Supplementary file 2 [file wcd-2021-52-supplement.pdf]

1 **Supplementary Material**

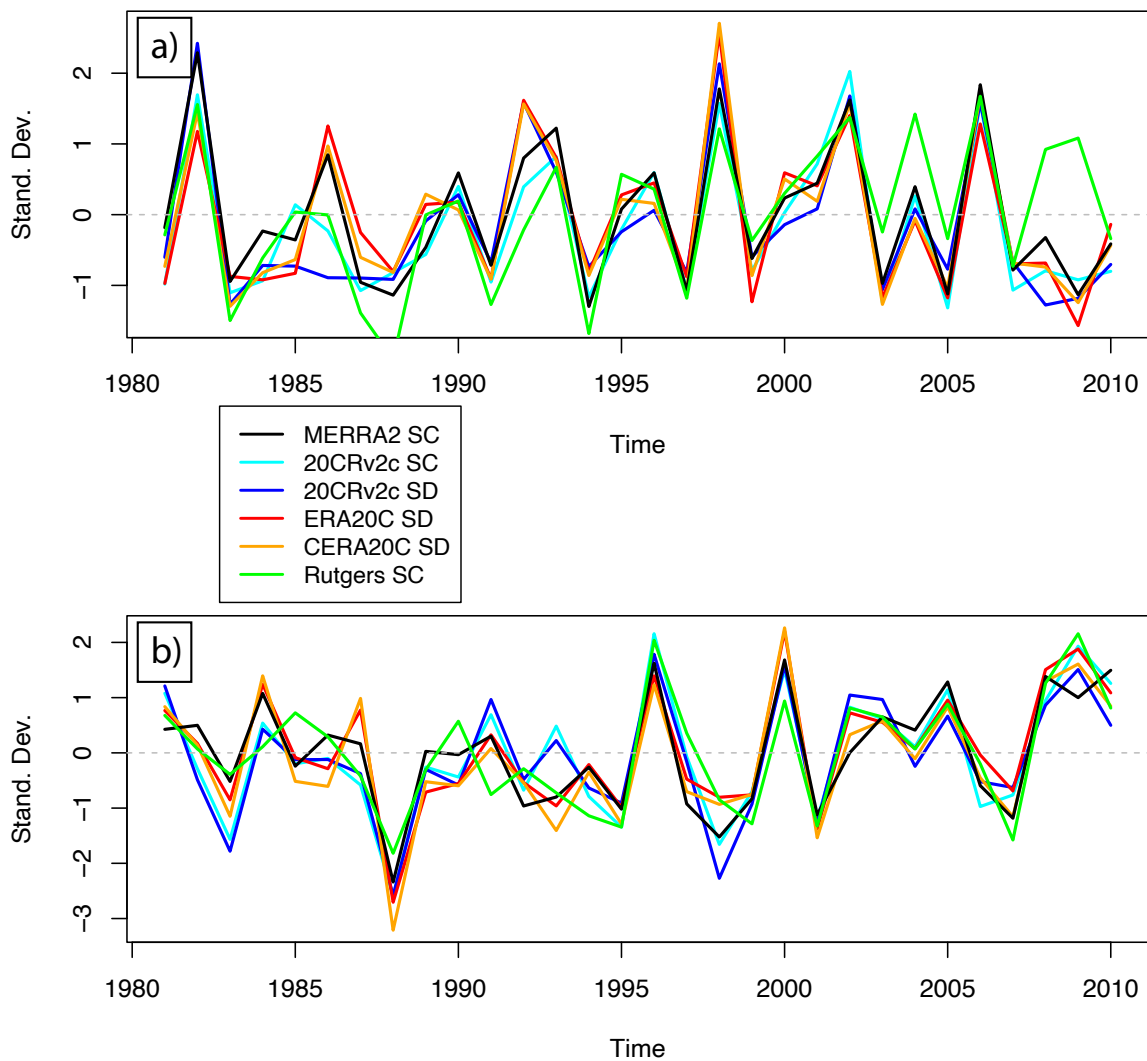

2

3 *Figure S1: Comparison of a) October snow indices and b) November snow indices for the*  
 4 *period 1981-2010 in multiple reanalysis products as well as the Rutgers snow laboratory*  
 5 *satellite-based snow cover product (Robinson et al. 2012).*

6 *Table S2: Correlation coefficient for 110 years between reconstructed NAO index values and*  
 7 *ERA20C, ASF-20C CTL ensemble mean and ASF-20C EXP ensemble mean NAO index values*

|                    | <b>DEC</b> | <b>JAN</b> | <b>FEB</b> | <b>DJF</b> |
|--------------------|------------|------------|------------|------------|
| <b>ERA-20C</b>     | 0.67       | 0.88       | 0.9        | 0.83       |
| <b>ASF-20C CTL</b> | -0.09      | 0.25       | 0.19       | 0.33       |
| <b>ASF-20C EXP</b> | -0.13      | 0.2        | 0.16       | 0.34       |

8

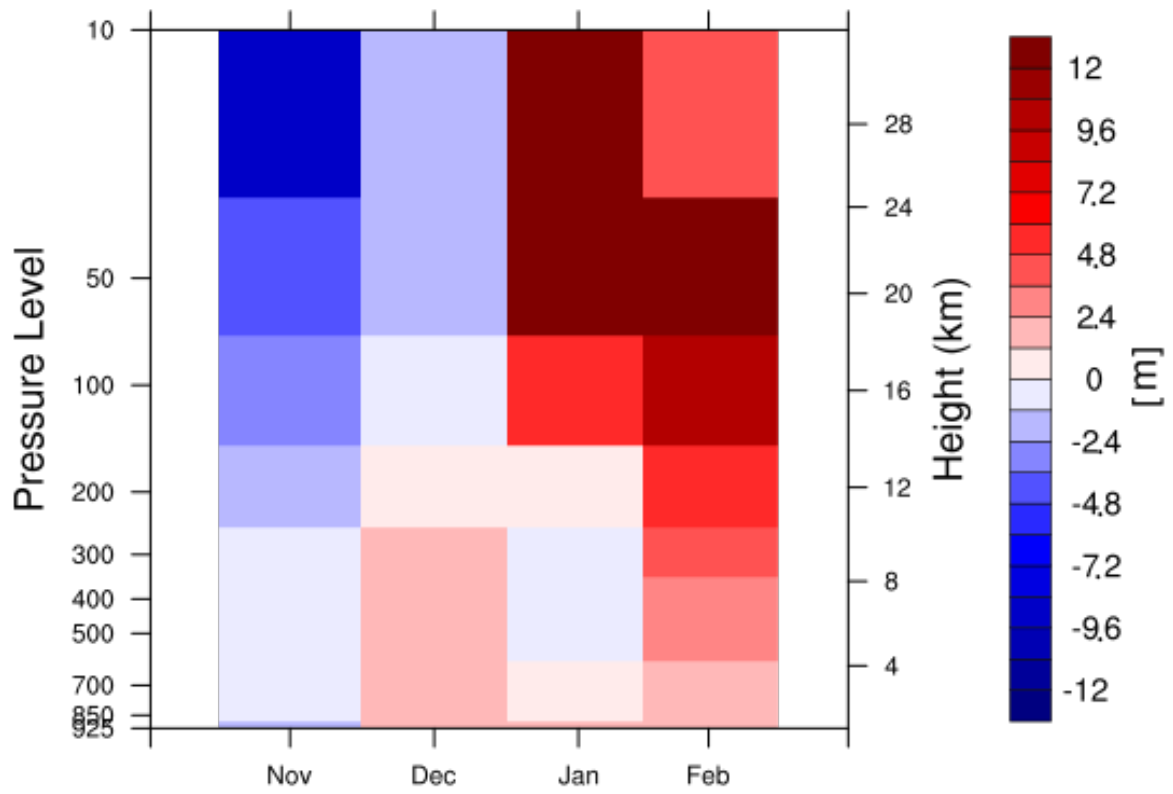

9

10 *Figure S2: Polar-cap averaged (180°E–180°W, 60°N–90°N) geopotential (height) anomalies*  
11 *for the period 1901-2010 between high-snow and low-snow ASF-20C EXP ensemble means.*  
12 *Shading indicates 90% significance level.*

13

14

15

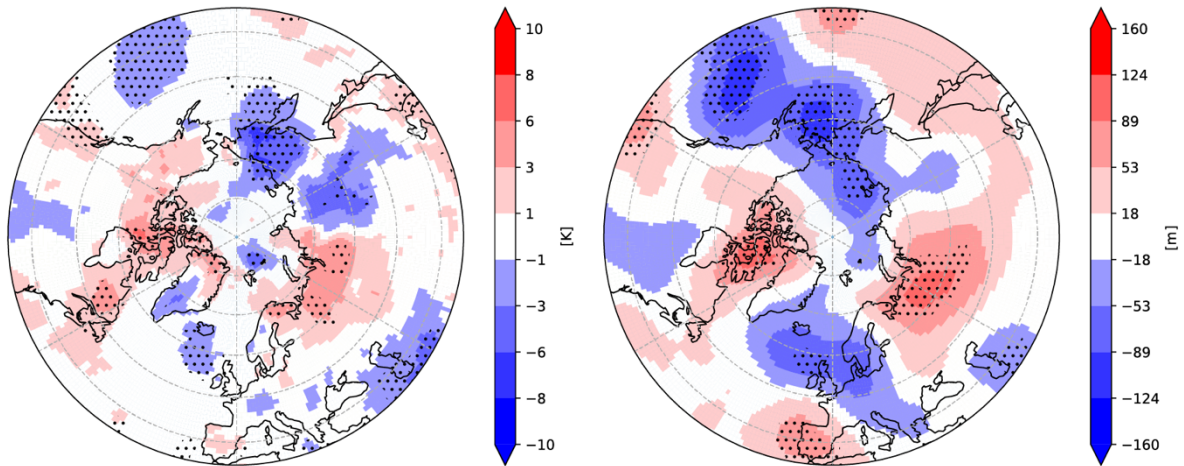

16  
 17 *Figure S3: November 1st precondition composites where the NAO DJF of the AFS20C CTL*  
 18 *ensemble mean is < 1 stand. dev minus composites where the NAO DJF of the AFS20C CTL*  
 19 *ensemble mean is > 1 stand. dev. (for a list of years see below). From left to right: 2m*  
 20 *temperature and 500 hPa GPH anomalies. Stippled areas represent 90% significance.*

21 + NAO DJF

22 years: 1901, 1904, 1908, 1909, 1915, 1919, 1920, 1922, 1925, 1927, 1930, 1932, 1945, 1964, 1973, 19  
 23 78, 1989, 2000, 2002

24 - NAO DJF years:

25 1917, 1918, 1924, 1931, 1934, 1940, 1941, 1950, 1951, 1977, 1980, 1982, 1998, 2010

26

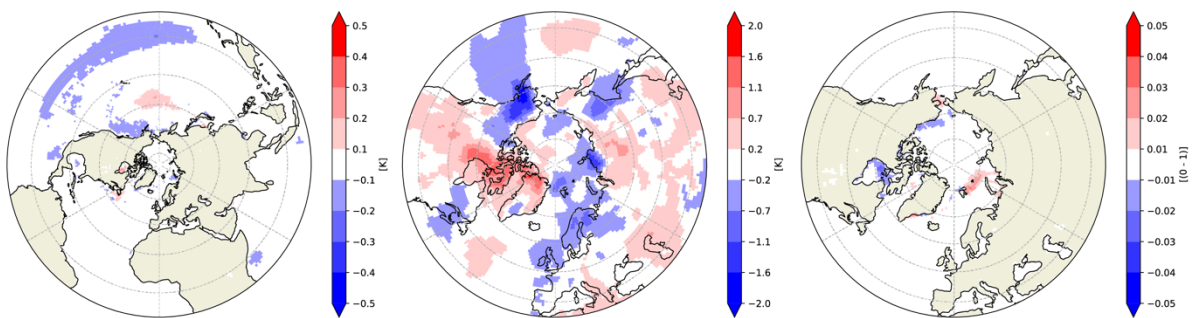

27  
 28 *Figure S4: ERA20C climate anomaly composites of November 1st preconditions after which a*  
 29 *positive snow dipole forcing resulted in a negative DJF NAO signal (based on Figure 3c):*  
 30 *From left to right: SSTs, 2m temperature and sea ice concentration anomalies. Anomalies are*  
 31 *computed with respect to the 1901–2010 average.*

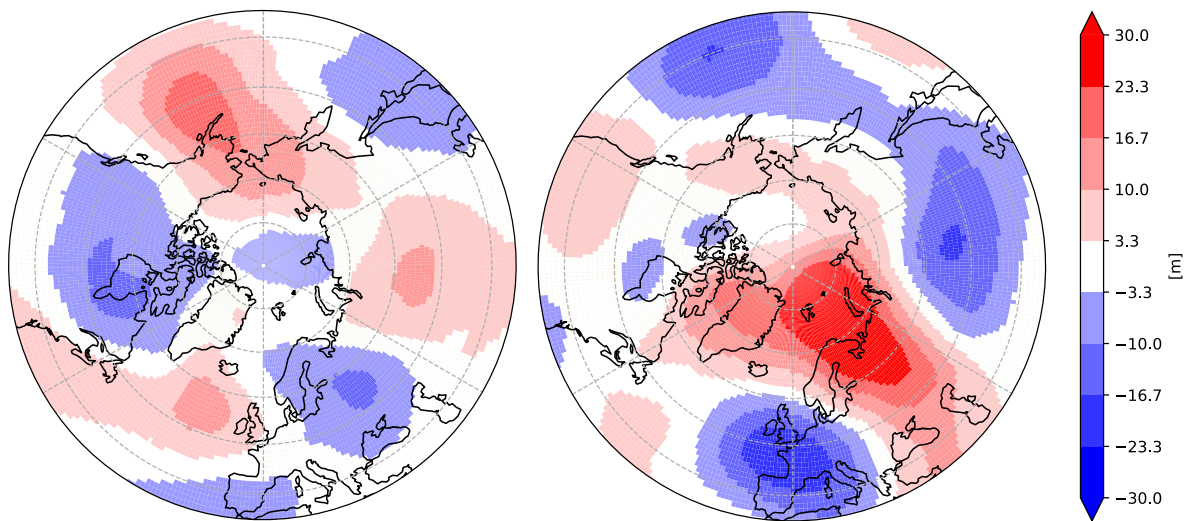

33

34 *Figure S5: Averaged 500 hPa geopotential height anomalies for left) the period 1921–1941*  
35 *and right) 1991–2010 between high-snow and low-snow ASF-20C EXP ensemble means in*  
36 *December.*
